# Supplementary material for: Effective nerve cell modulation by electrical stimulation of carbon nanotube embedded conductive polymeric scaffolds
Source: Royal Society of Chemistry journal article supplement (doi:10.1039/c8bm00553b), 2018-01-01
Supplement: c8bm00553b1.pdf [file c8bm00553b1.pdf]

## Supporting Information

### *Effective Nerve Cell Modulation by Electrical Stimulation of Carbon Nanotube Embedded Conductive Polymeric Scaffolds*

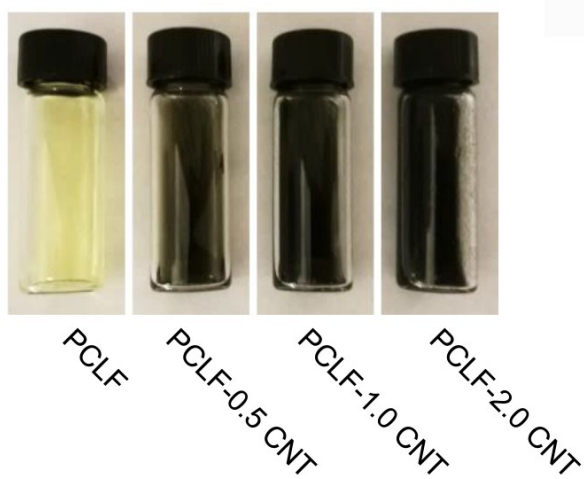

**Figure S1** Gross observation of PCLF-BAPO-DMF and PCLF-CNT-BAPO-DMF mixtures.
